# Supplementary material
Source: PubMed Central journal article supplement (PMC7317158)
Supplement: piy113_suppl_supplemental-figure-1.pdf [file piy113_suppl_supplemental-figure-1.pdf]

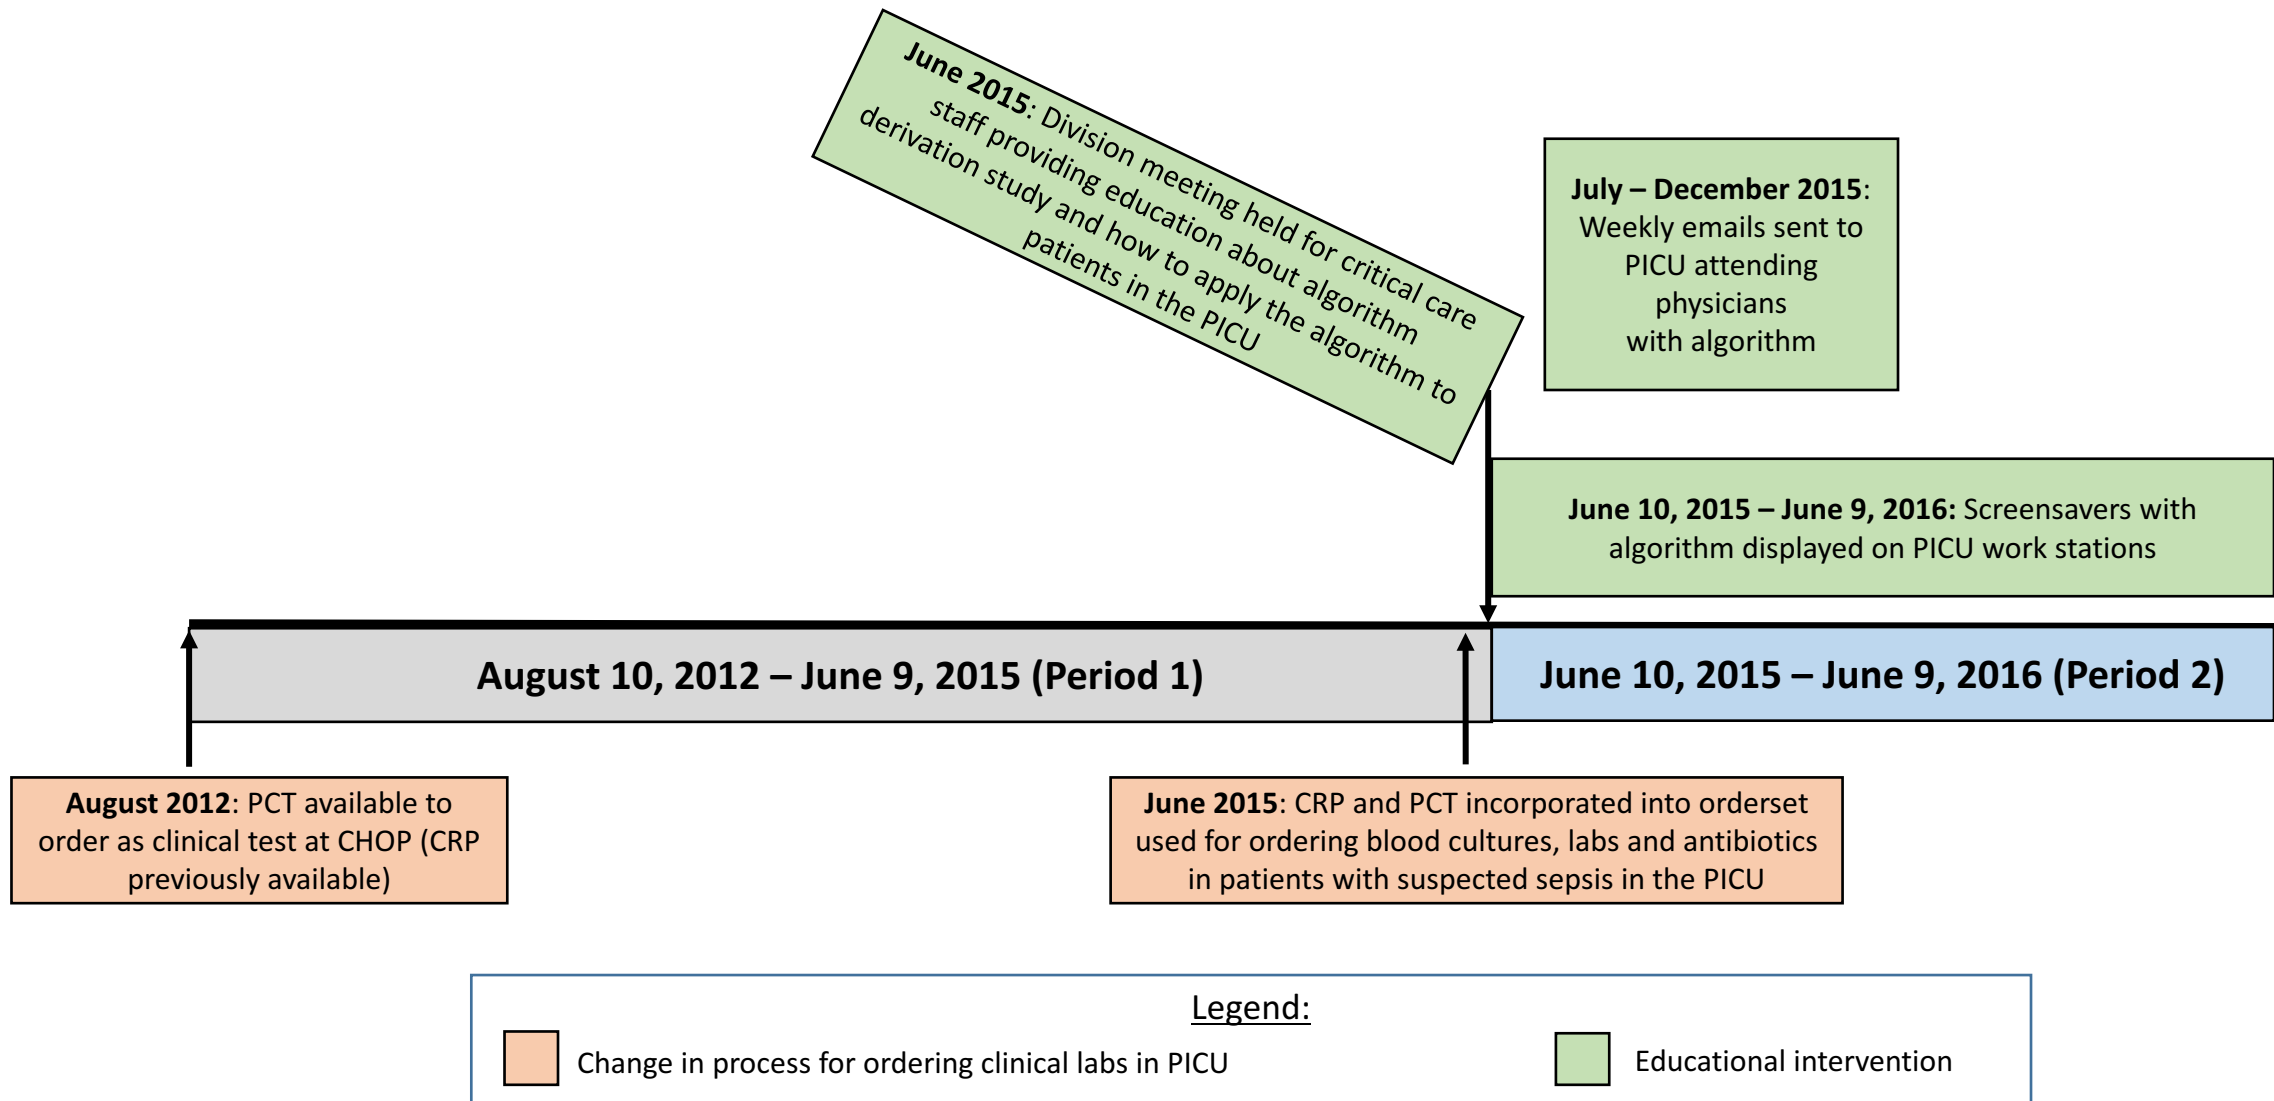

**Algorithm:** Clinicians in the PICU should consider stopping antibiotics if all of the following criteria are met: a) sterile site cultures obtained at SIRS onset revealed no growth at 48 hours, b) both biomarkers obtained at SIRS onset were low (CRP <4 mg/dL *and* PCT <1 ng/mL), and c) no focal signs of infection were present on exam or by imaging.

- Clinicians were not required to order biomarkers at SIRS onset or to adhere to the algorithm.
- All clinical decisions during both periods were made at the discretion of the treating PICU team.
